# Supplementary material for: Photochemical UVC/H2O2 oxidation system as an effective method for the decolourisation of bio-treated textile wastewaters: towards onsite water reuse
Source: Royal Society of Chemistry journal article supplement (doi:10.1039/c6ra15615k), 2016-01-01
Supplement: c6ra15615k1.pdf [file c6ra15615k1.pdf]

## Supplementary Data

### **Manuscript Title: Photochemical UVC/H<sub>2</sub>O<sub>2</sub> Oxidation System as an Effective Method for the Decolourisation of Bio-Treated Textile Wastewaters: Towards Onsite Water Reuse**

**Authors:** Marcia M. F. F. Salim<sup>a,1</sup>, Aline Novack<sup>a,1</sup>, Petrick A. Soares<sup>1,\*</sup>, Ângela B. Medeiros<sup>1</sup>, Miguel A. Granato<sup>1</sup>, Antonio A. U. Souza<sup>1</sup>, Vítor J. P. Vilar<sup>2,\*</sup>, Selene M. A. Guelli U. Souza<sup>1</sup>

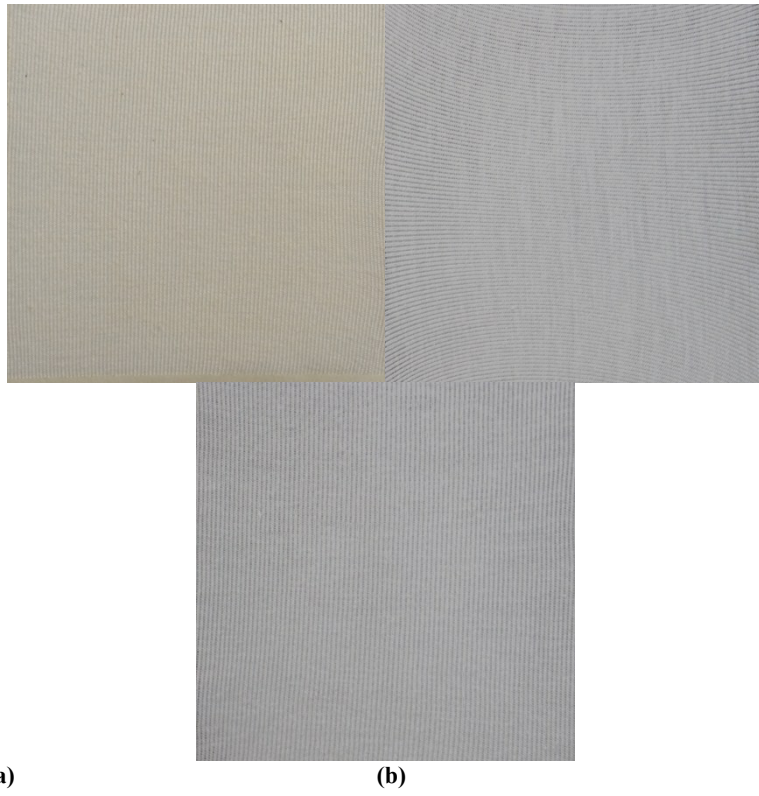

**Figure S1.** Comparative image between the samples to different conditions of bleaching and unbleached. (a) Unbleached; (b) Bleaching with distilled water; (c) Bleaching with photochemical-treated wastewater (PTWB).

CyberChrome, Inc.  
 Stone Ridge, NY  
 Printed: 22/3/2016 -- 15:04:20  
 Measured On: CM-3600A CRBGLL

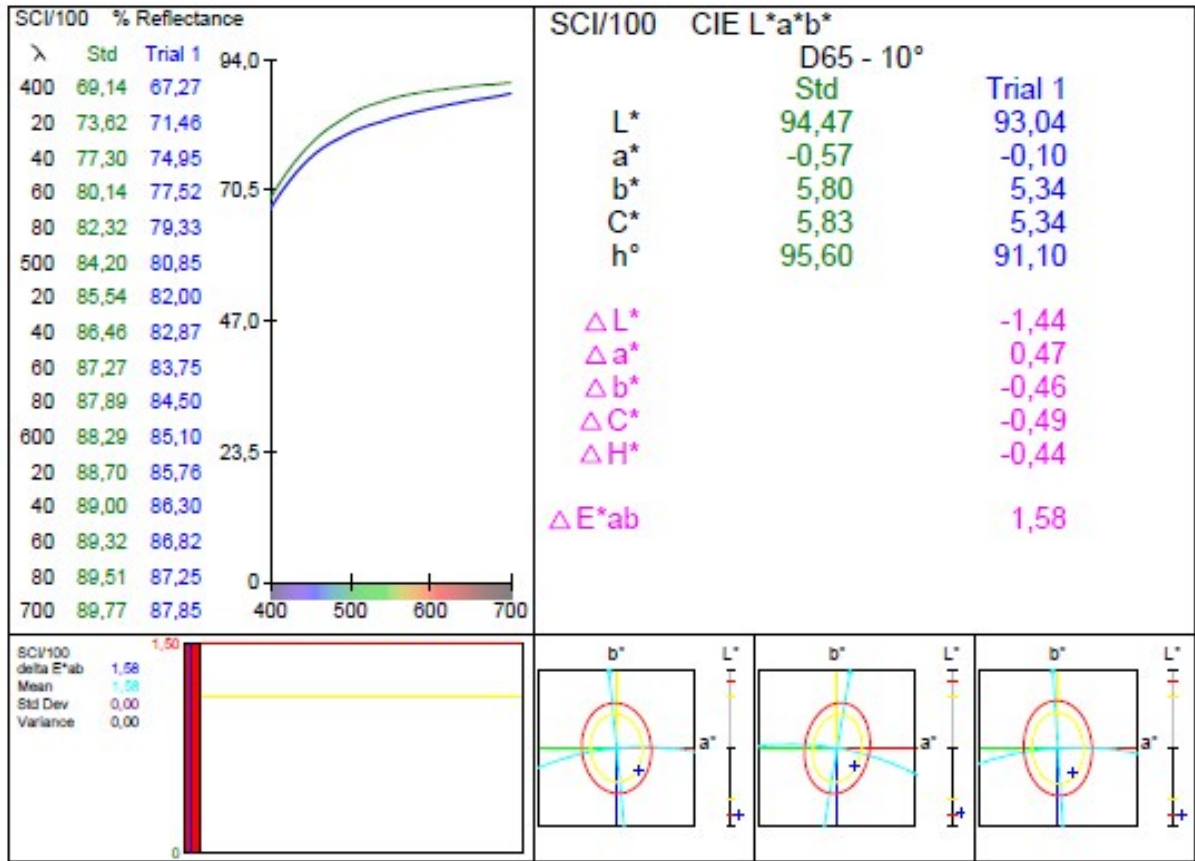

**Figure S2.** Report provided by Cyberchrome program (CM 3600A spectrophotometer of Konica Minolta Co. Ltd.) for the bleaching processes with distilled water (Standard) and PTWB (Trial 1) as bathwater.

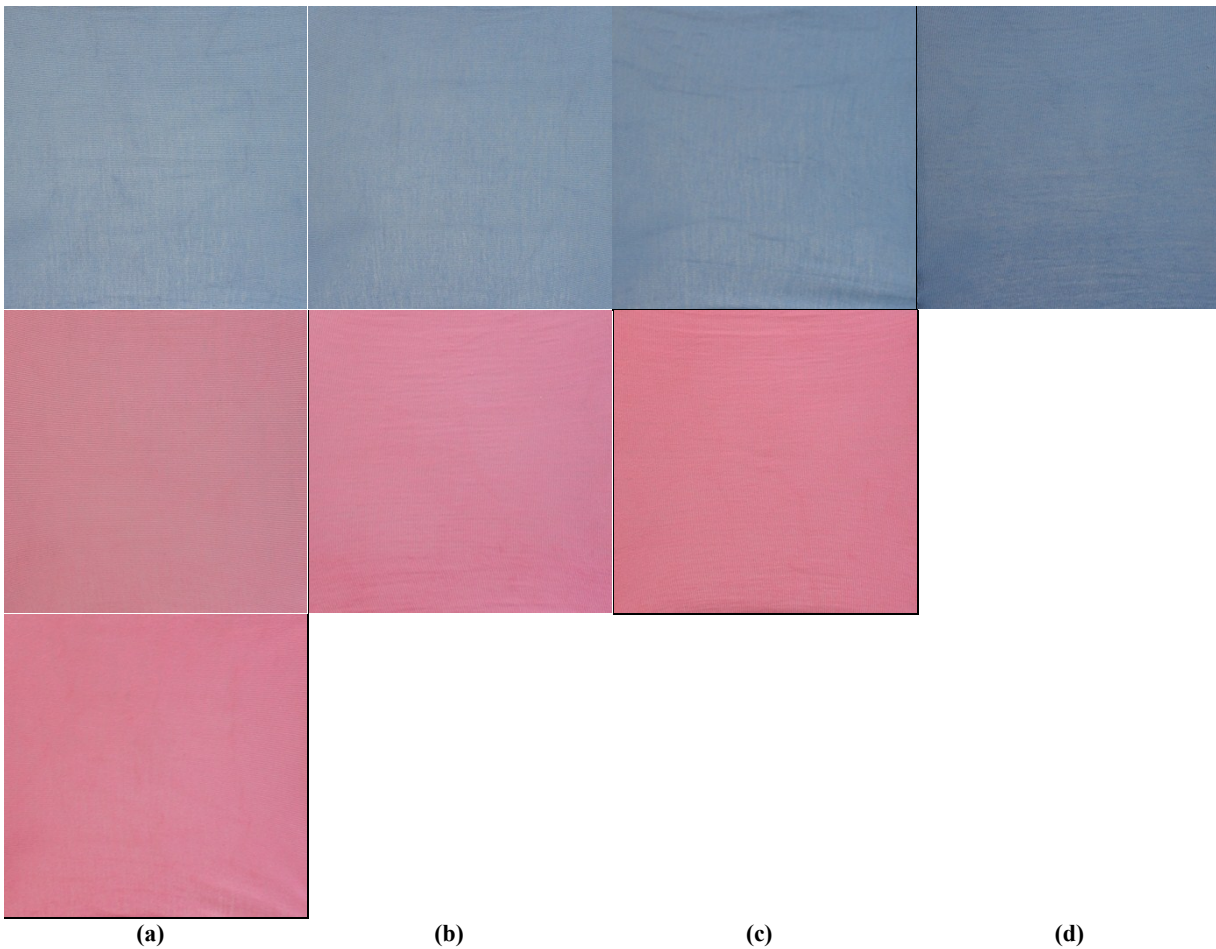

**Figure S3.** Comparative image between the samples for two different dyeing processes (Direct Red 80 - C.I.35780 and Direct Blue 71 - C.I.34140) with different types of bath water. (a) with distilled water; (b) with 50% of distilled water and 50% of photochemical-treated textile wastewater (PTWB); (c) with photochemical-treated textile wastewater (PTWB) and; (d) with bio-treated textile wastewater (TWB).

CyberChrome, Inc.  
 Stone Ridge, NY  
 Printed: 22/3/2016 -- 15:00:09  
 Measured On: CM-3600A CRBGLL

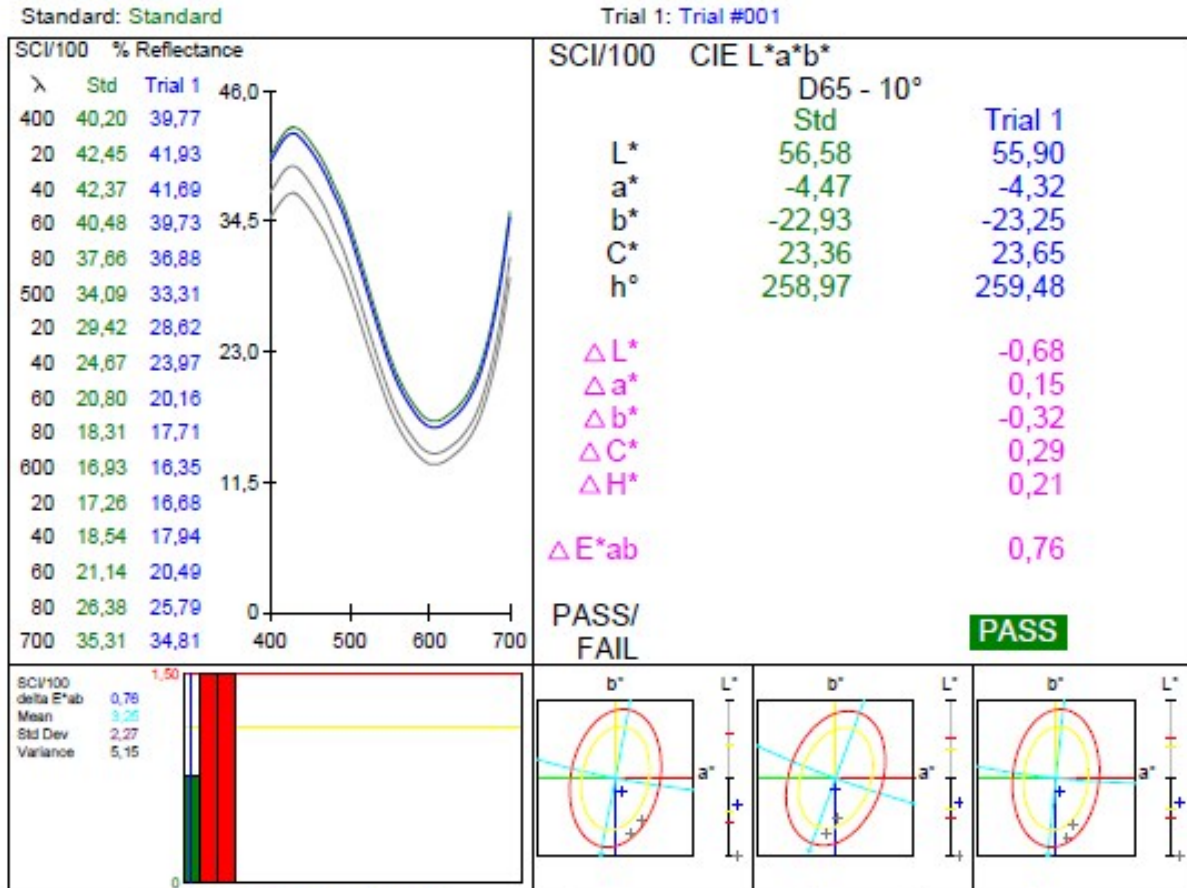

**Figure S4.** Report provided by Cyberchrome program (CM 3600A spectrophotometer of Konica Minolta Co. Ltd.) for the dyeing processes (Direct Blue 71 - C.I.34140) with distilled water (Standard) and 50% of distilled water with 50% of PTWB (Trial 1) as bathwater.

CyberChrome, Inc.  
 Stone Ridge, NY  
 Printed: 22/3/2016 -- 15:01:01  
 Measured On: CM-3600A CRBGLL

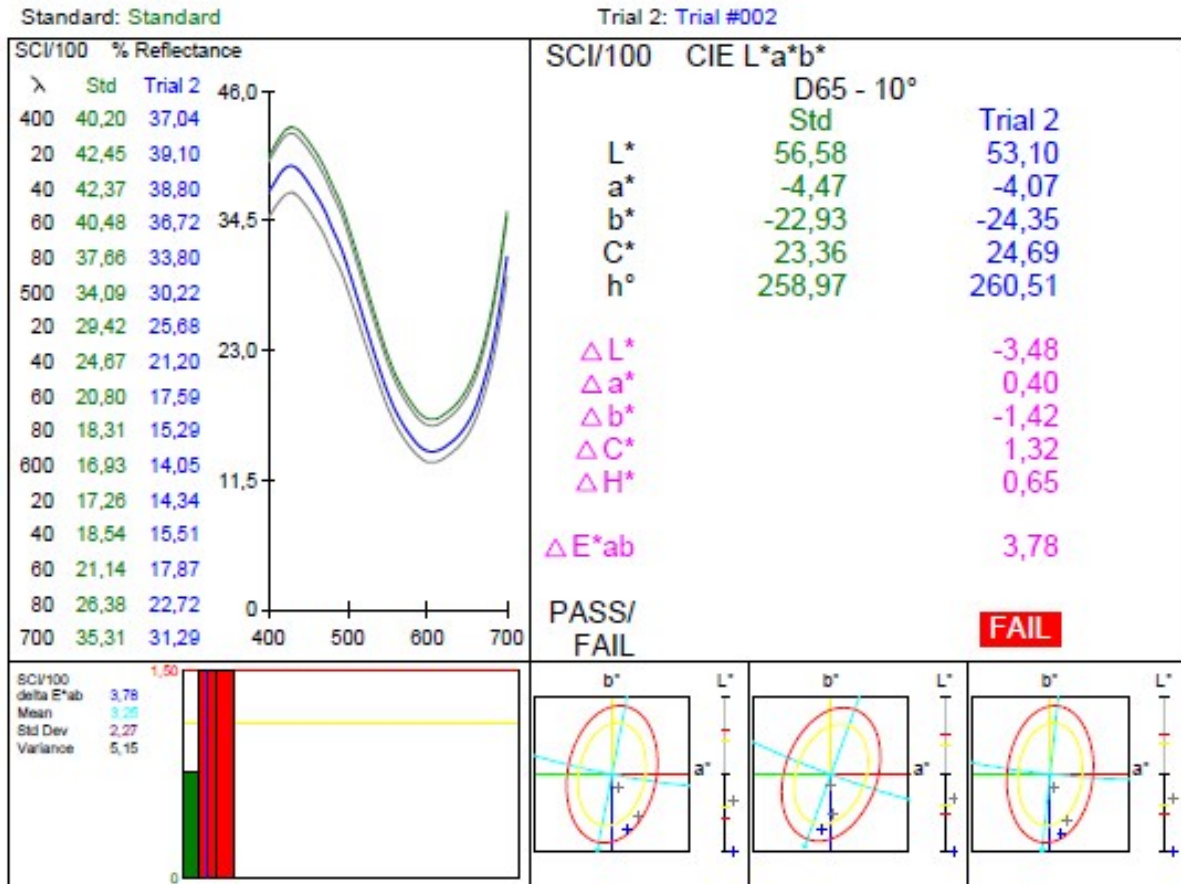

**Figure S5.** Report provided by Cyberchrome program (CM 3600A spectrophotometer of Konica Minolta Co. Ltd.) for the dyeing processes (Direct Blue 71 - C.I.34140) with distilled water (Standard) and PTWB (Trial 2) as bathwater.

CyberChrome, Inc.  
 Stone Ridge, NY  
 Printed: 22/3/2016 -- 15:01:28  
 Measured On: CM-3600A CRBGLL

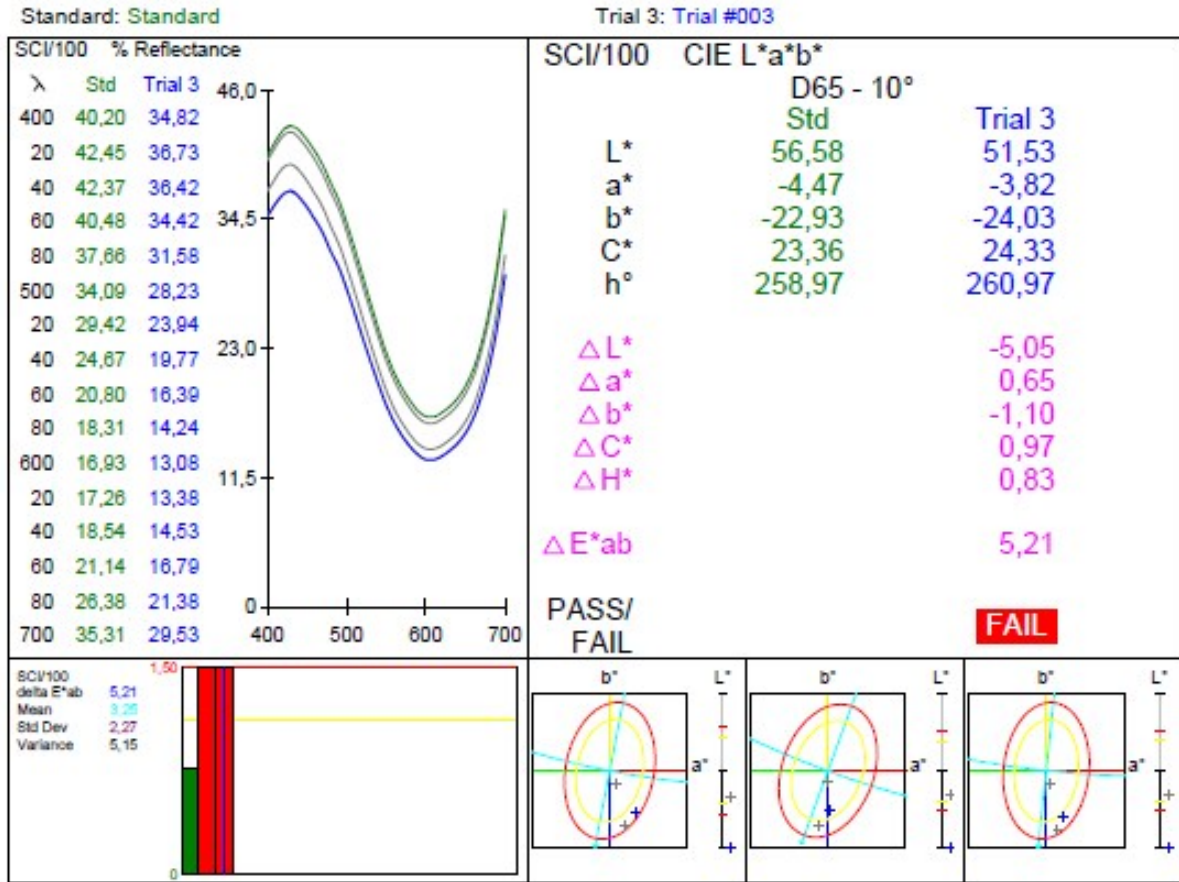

**Figure S6.** Report provided by Cyberchrome program (CM 3600A spectrophotometer of Konica Minolta Co. Ltd.) for the dyeing processes (Direct Blue 71 - C.I.34140) with distilled water (Standard) and TWB (Trial 3) as bathwater.

CyberChrome, Inc.  
 Stone Ridge, NY  
 Printed: 22/3/2016 -- 15:02:36  
 Measured On: CM-3600A CRBGLL

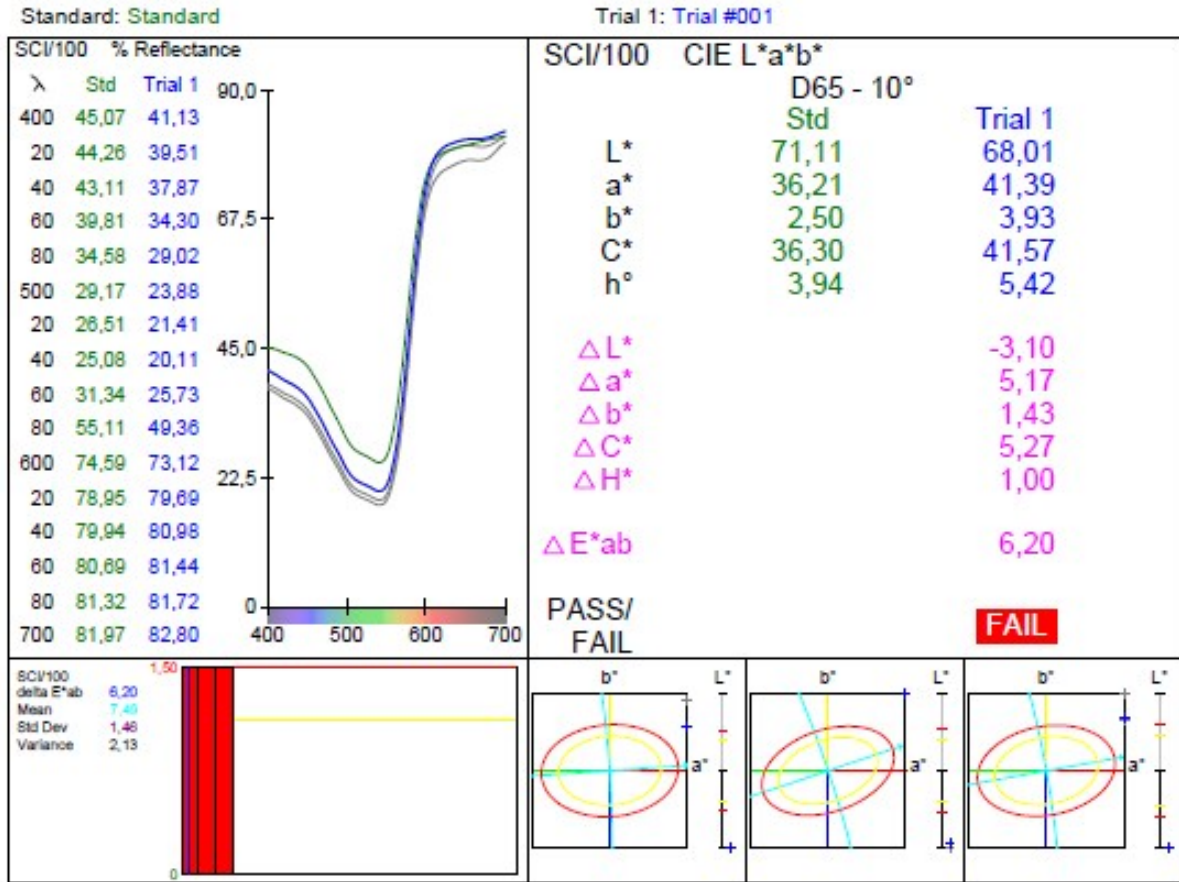

**Figure S7.** Report provided by Cyberchrome program (CM 3600A spectrophotometer of Konica Minolta Co. Ltd.) for the dyeing processes (Direct Red 80 - C.I.35780) with distilled water (Standard) and 50% of distilled water with 50% of PTWB (Trial 1) as bathwater.



CyberChrome, Inc.  
 Stone Ridge, NY  
 Printed: 22/3/2016 -- 15:03:07  
 Measured On: CM-3600A CRBGLL

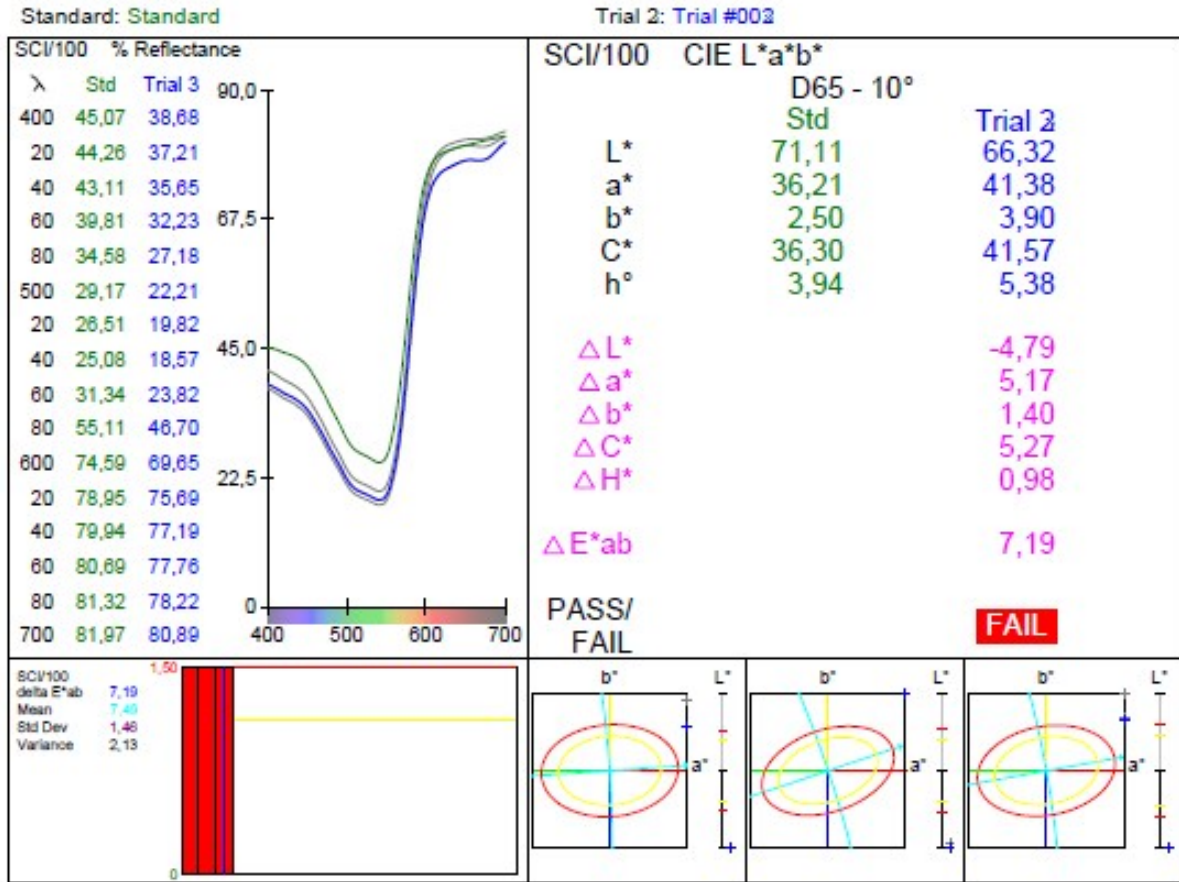

**Figure S8.** Report provided by Cyberchrome program (CM 3600A spectrophotometer of Konica Minolta Co. Ltd.) for the dyeing processes (Direct Red 80 - C.I.35780) with distilled water (Standard) and PTWB (Trial 2) as bathwater.

CyberChrome, Inc.  
 Stone Ridge, NY  
 Printed: 22/3/2016 -- 15:03:44  
 Measured On: CM-3600A CRBGLL

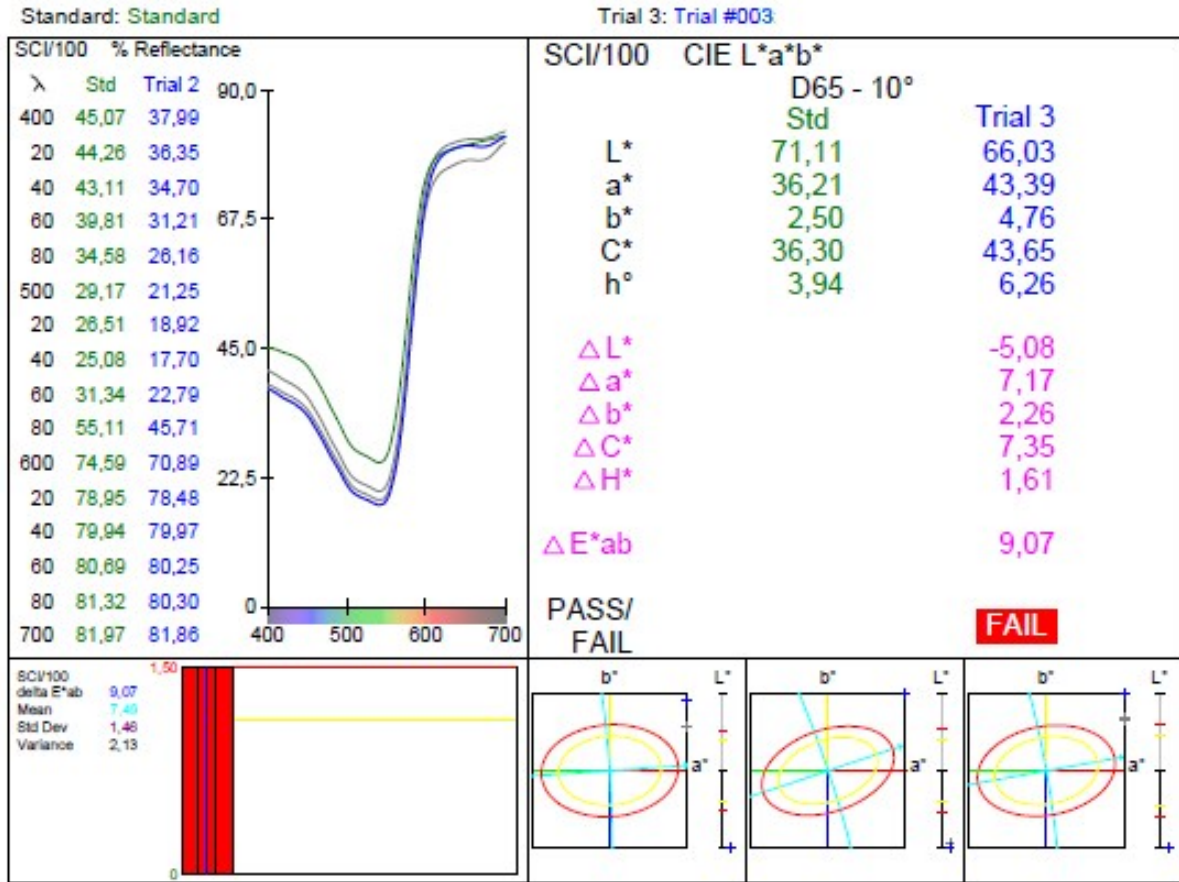

**Figure S9.** Report provided by Cyberchrome program (CM 3600A spectrophotometer of Konica Minolta Co. Ltd.) for the dyeing processes (Direct Red 80 - C.I.35780) with distilled water (Standard) and TWB (Trial 3) as bathwater.
